# Supplementary material for: Enhancing the structural durability of Ni-rich layered materials by post-process: washing and heat-treatment
Source: Royal Society of Chemistry journal article supplement (doi:10.1039/d0ta01083a), 2020-01-01
Supplement: d0ta01083a1.pdf [file d0ta01083a1.pdf]

## Supporting Information

### Enhancing the Structural Durability of Ni-Rich Layered Materials by Post-process: Washing and Heat-treatment

Received 00th January 20xx,  
Accepted 00th January 20xx

Wontae Lee<sup>†</sup>, Donghyun Lee<sup>†</sup>, Yunok Kim, Woosung Choi and Won-Sub Yoon\*

DOI: 10.1039/x0xx00000x

**Table S1.** The amount of residual lithium compounds for untreated NCA and treated NCA

| Sample    | Powder [g] | DI Water [g] | Solvent [g] | (1/2)Li <sub>2</sub> CO <sub>3</sub><br>[ppm] | LiOH<br>[ppm] | Free-Li<br>[ppm] |
|-----------|------------|--------------|-------------|-----------------------------------------------|---------------|------------------|
| Untreated | 10         | 100          | 20          | 4,132                                         | 5,159         | 2,271            |
| Treated   | 10         | 100          | 20          | 1,419                                         | 1,851         | 803              |

**Table S2a.** Rietveld refinement on the XRD pattern of the pristine Li<sub>1-x</sub>Ni<sub>0.88</sub>Co<sub>0.11</sub>Al<sub>0.01</sub>O<sub>2</sub> (untreated NCA)

| Space group : $R\bar{3}m$       |                  |                                 |   |                                |                  |                                          |
|---------------------------------|------------------|---------------------------------|---|--------------------------------|------------------|------------------------------------------|
| $a_{\text{hex}}$ : 2.87148(1) Å |                  | $c_{\text{hex}}$ : 14.1892(1) Å |   | Volume : 101.32 Å <sup>3</sup> |                  | $S(R_{\text{wp}}/R_{\text{exp}}) = 2.09$ |
| Atom                            | Wyckoff position | x                               | y | z                              | $B_{\text{iso}}$ | Occupancy                                |
| Li                              | 3b               | 0                               | 0 | 0.5                            | 1.00             | 0.915(5)                                 |
| Ni <sub>Li</sub>                | 3b               | 0                               | 0 | 0.5                            | 1.00             | 0.084(5)                                 |
| Ni                              | 3a               | 0                               | 0 | 0                              | 1.3(1)           | 0.795(5)                                 |
| Co                              | 3a               | 0                               | 0 | 0                              | 1.3(1)           | 0.11                                     |
| Al                              | 3a               | 0                               | 0 | 0                              | 1.3(1)           | 0.01                                     |
| O                               | 6c               | 0                               | 0 | 0.2560(6)                      | 1.00             | 2.00                                     |

**Table S2b.** Rietveld refinement on the XRD pattern of the pristine Li<sub>1-x</sub>Ni<sub>0.88</sub>Co<sub>0.11</sub>Al<sub>0.01</sub>O<sub>2</sub> (treated NCA)

| Space group : $R\bar{3}m$       |                  |                                 |   |                                |                  |                                          |
|---------------------------------|------------------|---------------------------------|---|--------------------------------|------------------|------------------------------------------|
| $a_{\text{hex}}$ : 2.87079(2) Å |                  | $c_{\text{hex}}$ : 14.1837(2) Å |   | Volume : 101.23 Å <sup>3</sup> |                  | $S(R_{\text{wp}}/R_{\text{exp}}) = 2.19$ |
| Atom                            | Wyckoff position | x                               | y | z                              | $B_{\text{iso}}$ | Occupancy                                |
| Li                              | 3b               | 0                               | 0 | 0.5                            | 1.00             | 0.944(5)                                 |
| Ni <sub>Li</sub>                | 3b               | 0                               | 0 | 0.5                            | 1.00             | 0.055(5)                                 |
| Ni                              | 3a               | 0                               | 0 | 0                              | 1.8(1)           | 0.824(5)                                 |
| Co                              | 3a               | 0                               | 0 | 0                              | 1.8(1)           | 0.11                                     |
| Mn                              | 3a               | 0                               | 0 | 0                              | 1.8(1)           | 0.01                                     |
| O                               | 6c               | 0                               | 0 | 0.2574(6)                      | 1.00             | 2.00                                     |

**Table S3a.** Rietveld refinement on the XRD pattern of the 2<sup>nd</sup> cycled Li<sub>1-x</sub>Ni<sub>0.88</sub>Co<sub>0.11</sub>Al<sub>0.01</sub>O<sub>2</sub> (untreated NCA)

| Space group : R-3m                        |                  |                                           |   |                                 |                  |                                          |
|-------------------------------------------|------------------|-------------------------------------------|---|---------------------------------|------------------|------------------------------------------|
| $a_{\text{hex}} : 2.86535(3) \text{ \AA}$ |                  | $c_{\text{hex}} : 14.2248(2) \text{ \AA}$ |   | Volume : 101.143 $\text{\AA}^3$ |                  | $S(R_{\text{wp}}/R_{\text{exp}}) = 1.63$ |
| Atom                                      | Wyckoff position | x                                         | y | z                               | $B_{\text{iso}}$ | Occupancy                                |
| Li                                        | 3b               | 0                                         | 0 | 0.5                             | 1.00             | 0.877(6)                                 |
| Ni <sub>Li</sub>                          | 3b               | 0                                         | 0 | 0.5                             | 1.00             | 0.036(6)                                 |
| Ni                                        | 3a               | 0                                         | 0 | 0                               | 0.37(8)          | 0.843(6)                                 |
| Co                                        | 3a               | 0                                         | 0 | 0                               | 0.37(8)          | 0.11                                     |
| Al                                        | 3a               | 0                                         | 0 | 0                               | 0.37(8)          | 0.01                                     |
| O                                         | 6c               | 0                                         | 0 | 0.2590(6)                       | 1.00             | 2.00                                     |

**Table S3b.** Rietveld refinement on the XRD pattern of the 2<sup>nd</sup> cycled  $\text{Li}_{1-x}\text{Ni}_{0.88}\text{Co}_{0.11}\text{Al}_{0.01}\text{O}_2$  (treated NCA)

| Space group : R-3m                        |                  |                                           |   |                                 |                  |                                          |
|-------------------------------------------|------------------|-------------------------------------------|---|---------------------------------|------------------|------------------------------------------|
| $a_{\text{hex}} : 2.86465(2) \text{ \AA}$ |                  | $c_{\text{hex}} : 14.2190(2) \text{ \AA}$ |   | Volume : 101.052 $\text{\AA}^3$ |                  | $S(R_{\text{wp}}/R_{\text{exp}}) = 2.57$ |
| Atom                                      | Wyckoff position | x                                         | y | z                               | $B_{\text{iso}}$ | Occupancy                                |
| Li                                        | 3b               | 0                                         | 0 | 0.5                             | 1.00             | 0.908(5)                                 |
| Ni <sub>Li</sub>                          | 3b               | 0                                         | 0 | 0.5                             | 1.00             | 0.030(5)                                 |
| Ni                                        | 3a               | 0                                         | 0 | 0                               | 1.16(8)          | 0.849(5)                                 |
| Co                                        | 3a               | 0                                         | 0 | 0                               | 1.16(8)          | 0.11                                     |
| Mn                                        | 3a               | 0                                         | 0 | 0                               | 1.16(8)          | 0.01                                     |
| O                                         | 6c               | 0                                         | 0 | 0.2593(5)                       | 1.00             | 2.00                                     |

**Table S4a.** Rietveld refinement on the XRD pattern of the 300<sup>th</sup> cycled  $\text{Li}_{1-x}\text{Ni}_{0.88}\text{Co}_{0.11}\text{Al}_{0.01}\text{O}_2$  (untreated NCA)

| Space group : R-3m                        |                  |                                           |   |                                 |                  |                                          |
|-------------------------------------------|------------------|-------------------------------------------|---|---------------------------------|------------------|------------------------------------------|
| $a_{\text{hex}} : 2.85826(7) \text{ \AA}$ |                  | $c_{\text{hex}} : 14.2659(1) \text{ \AA}$ |   | Volume : 100.934 $\text{\AA}^3$ |                  | $S(R_{\text{wp}}/R_{\text{exp}}) = 2.37$ |
| Atom                                      | Wyckoff position | x                                         | y | z                               | $B_{\text{iso}}$ | Occupancy                                |
| Li                                        | 3b               | 0                                         | 0 | 0.5                             | 1.00             | 0.585(4)                                 |
| Ni <sub>Li</sub>                          | 3b               | 0                                         | 0 | 0.5                             | 1.00             | 0.059(4)                                 |
| Ni                                        | 3a               | 0                                         | 0 | 0                               | 0.45(6)          | 0.820(4)                                 |
| Co                                        | 3a               | 0                                         | 0 | 0                               | 0.45(6)          | 0.11                                     |
| Al                                        | 3a               | 0                                         | 0 | 0                               | 0.45(6)          | 0.01                                     |
| O                                         | 6c               | 0                                         | 0 | 0.2595(4)                       | 1.00             | 2.00                                     |

**Table S4b.** Rietveld refinement on the XRD pattern of the 300<sup>th</sup> cycled  $\text{Li}_{1-x}\text{Ni}_{0.88}\text{Co}_{0.11}\text{Al}_{0.01}\text{O}_2$  (treated NCA)

| Space group : R-3m                        |                  |                                           |   |                                 |                  |                                          |
|-------------------------------------------|------------------|-------------------------------------------|---|---------------------------------|------------------|------------------------------------------|
| $a_{\text{hex}} : 2.86152(1) \text{ \AA}$ |                  | $c_{\text{hex}} : 14.2362(1) \text{ \AA}$ |   | Volume : 100.954 $\text{\AA}^3$ |                  | $S(R_{\text{wp}}/R_{\text{exp}}) = 2.49$ |
| Atom                                      | Wyckoff position | x                                         | y | z                               | $B_{\text{iso}}$ | Occupancy                                |
| Li                                        | 3b               | 0                                         | 0 | 0.5                             | 1.00             | 0.770(5)                                 |
| Ni <sub>Li</sub>                          | 3b               | 0                                         | 0 | 0.5                             | 1.00             | 0.045(5)                                 |
| Ni                                        | 3a               | 0                                         | 0 | 0                               | 0.72(7)          | 0.834(5)                                 |
| Co                                        | 3a               | 0                                         | 0 | 0                               | 0.72(7)          | 0.11                                     |
| Mn                                        | 3a               | 0                                         | 0 | 0                               | 0.72(7)          | 0.01                                     |
| O                                         | 6c               | 0                                         | 0 | 0.2595(5)                       | 1.00             | 2.00                                     |

**Table S5a.** Rate capability of untreated  $\text{Li}_{1-x}\text{Ni}_{0.88}\text{Co}_{0.11}\text{Al}_{0.01}\text{O}_2$  (untreated NCA)

| Discharge capacities |        |        |        |        |
|----------------------|--------|--------|--------|--------|
| Cell No.             | C-rate |        |        |        |
|                      | 0.2    | 0.5    | 1.0    | 2.0    |
| 1                    | 100 %  | 96.6 % | 93.8 % | 87.4 % |
| 2                    | 100 %  | 96.9 % | 94.4 % | 87.3 % |
| 3                    | 100 %  | 96.9 % | 94.3 % | 86.9 % |
| Average              | 100 %  | 96.8 % | 94.2 % | 87.2 % |

**Table S5b.** Rate capability of treated  $\text{Li}_{1-x}\text{Ni}_{0.88}\text{Co}_{0.11}\text{Al}_{0.01}\text{O}_2$  (treated NCA)

| Discharge capacities |        |        |        |        |
|----------------------|--------|--------|--------|--------|
| Cell No.             | C-rate |        |        |        |
|                      | 0.2    | 0.5    | 1.0    | 2.0    |
| 1                    | 100 %  | 97.2 % | 95.1 % | 88.0 % |
| 2                    | 100 %  | 97.3 % | 95.3 % | 88.7 % |
| 3                    | 100 %  | 97.2 % | 95.1 % | 89.3 % |
| Average              | 100 %  | 97.2 % | 95.1 % | 88.6 % |

**Table S6.** Curve fitting results for the Ni K-edge EXAFS of untreated and treated samples at 2<sup>nd</sup> charge and 2<sup>nd</sup> discharge state.

| $\text{LiNi}_{0.88}\text{Co}_{0.11}\text{Al}_{0.01}\text{O}_2$ |                           | Shell | CN | R(Å)     | $\sigma^2$ ( $\times 10^{-4} \text{Å}^2$ ) | R-factor |
|----------------------------------------------------------------|---------------------------|-------|----|----------|--------------------------------------------|----------|
| Untreated                                                      | 2 <sup>nd</sup> Charge    | Ni-O  | 6  | 1.883(2) | 31(3)                                      | 0.00361  |
|                                                                | 2 <sup>nd</sup> Discharge | Ni-O  | 6  | 1.916(1) | 83(1)                                      | 0.00210  |
| Treated                                                        | 2 <sup>nd</sup> Charge    | Ni-O  | 6  | 1.879(3) | 27(3)                                      | 0.00293  |
|                                                                | 2 <sup>nd</sup> Discharge | Ni-O  | 6  | 1.931(3) | 78(1)                                      | 0.00308  |

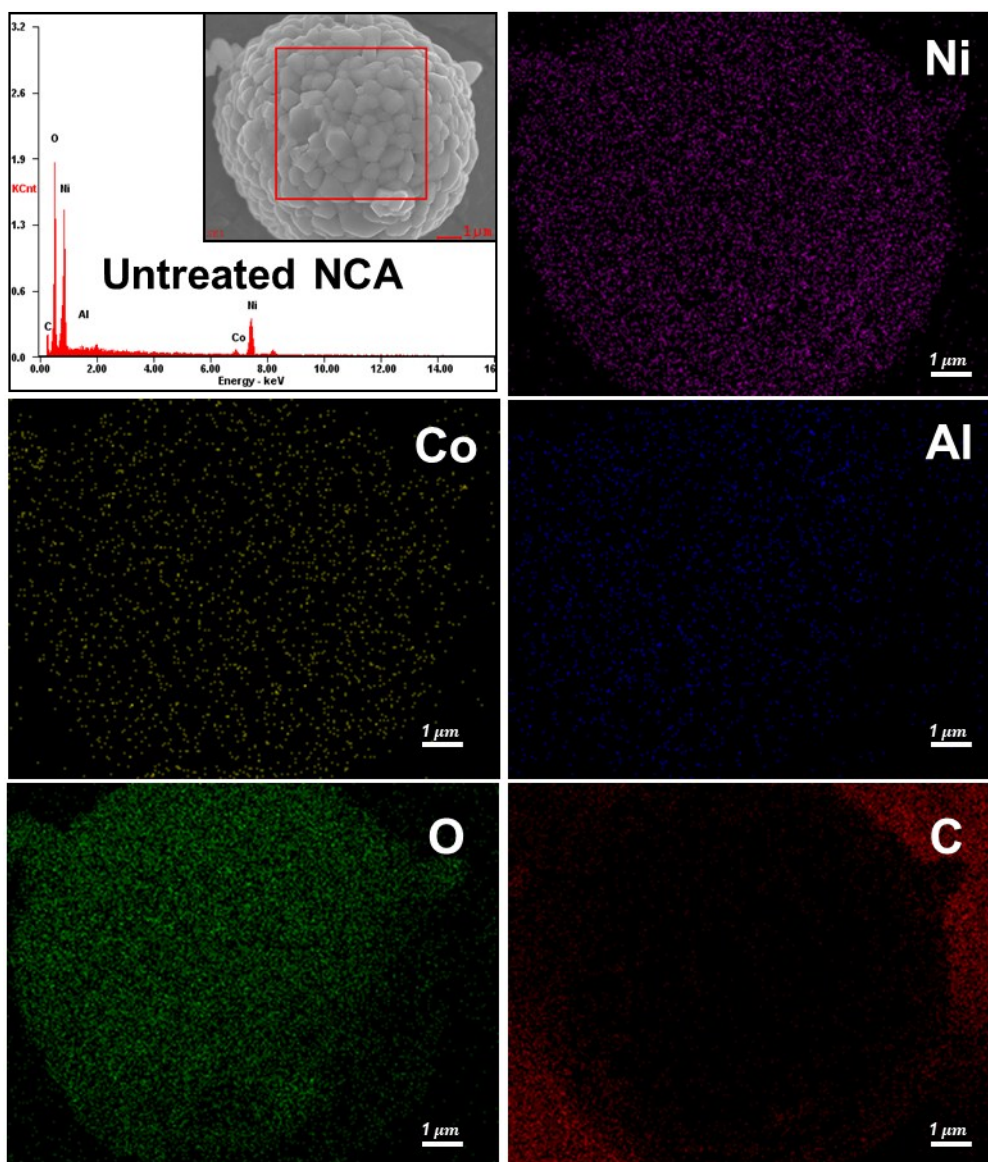

**Figure S1.** EDX mapping of untreated  $\text{Li}_{1-x}\text{Ni}_{0.88}\text{Co}_{0.11}\text{Al}_{0.01}\text{O}_2$  cathode materials



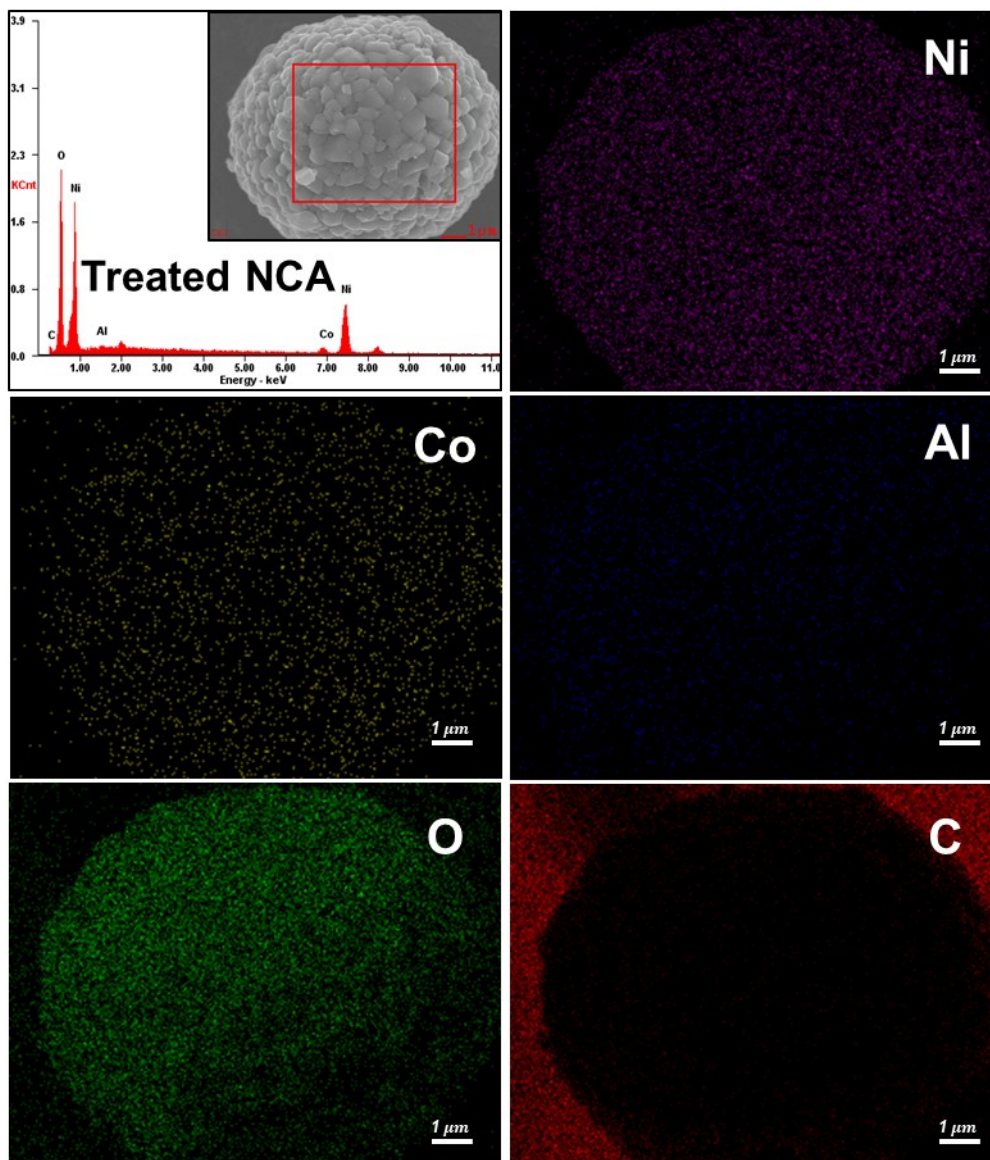

**Figure S2.** EDX mapping of treated  $\text{Li}_{1-x}\text{Ni}_{0.88}\text{Co}_{0.11}\text{Al}_{0.01}\text{O}_2$  cathode materials

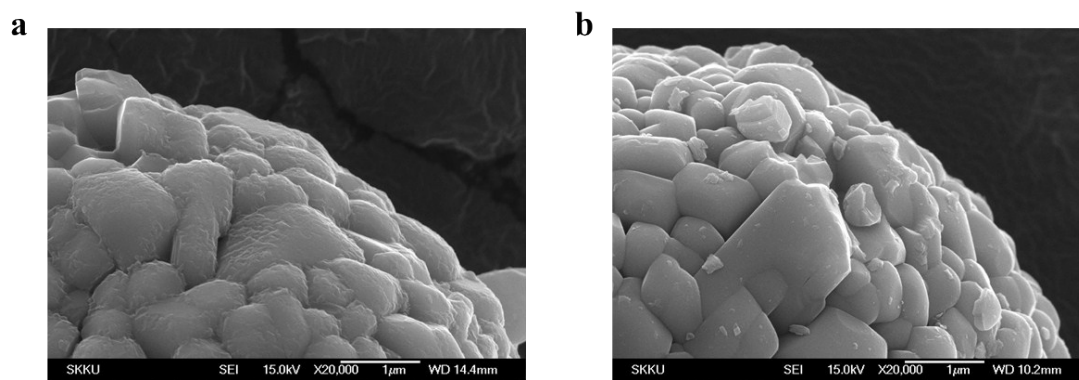

**Figure S3.** SEM images of as-prepared (a) untreated NCA and (b) treated NCA materials.

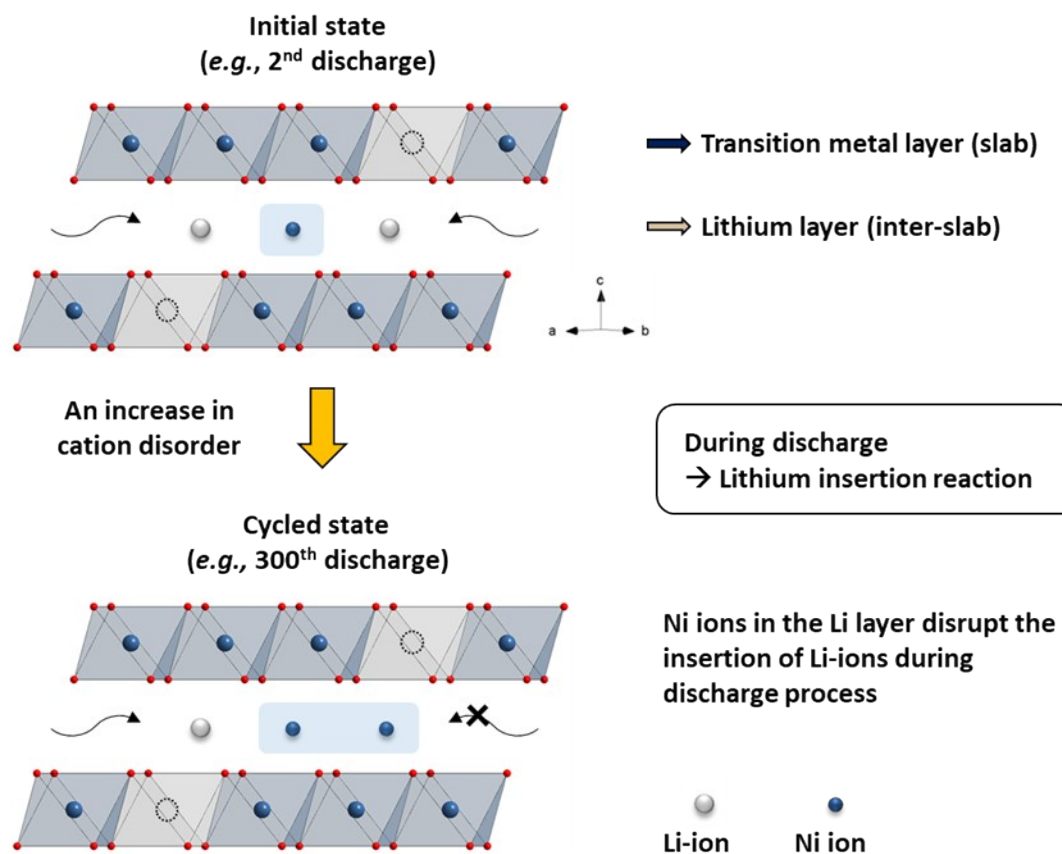

**Figure S4.** Schematic illustration of the lithium intercalation during discharge process before/after cycle.

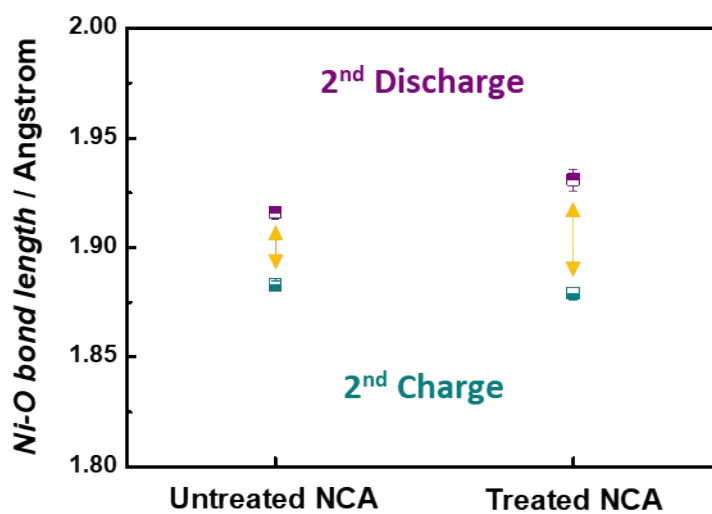

**Figure S5.** Structural parameters of the first coordination shell Ni-O for untreated and treated, respectively. Cyan color: Ni-O bond length at 2<sup>nd</sup> charge. Purple color: Ni- bond length at 2<sup>nd</sup> discharge.

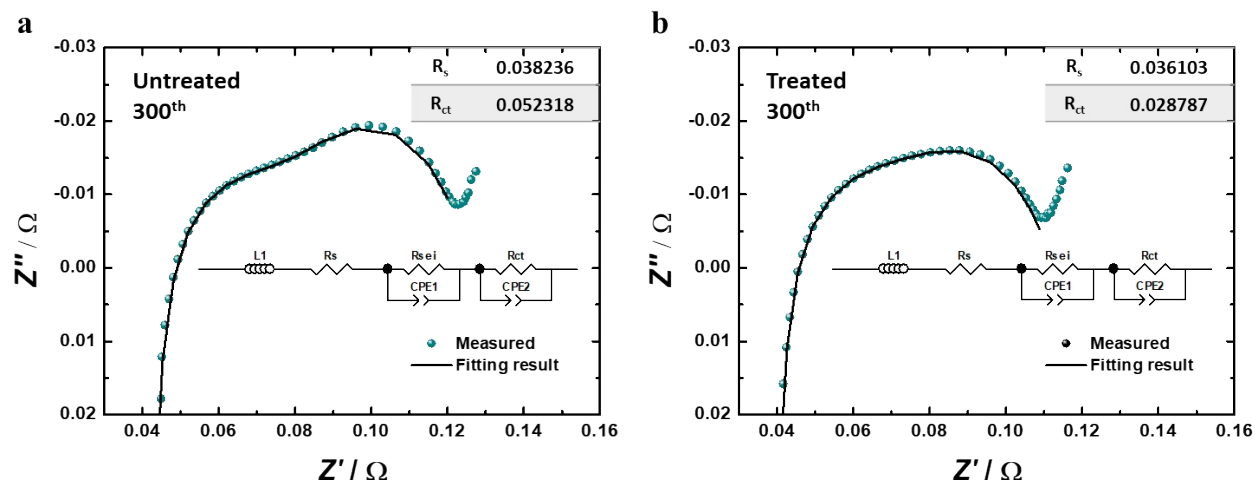

**Figure S6.** Electrochemical impedance spectra (EIS) of untreated and treated sample at 300<sup>th</sup> cycle and the equivalent circuits are shown as an inset.

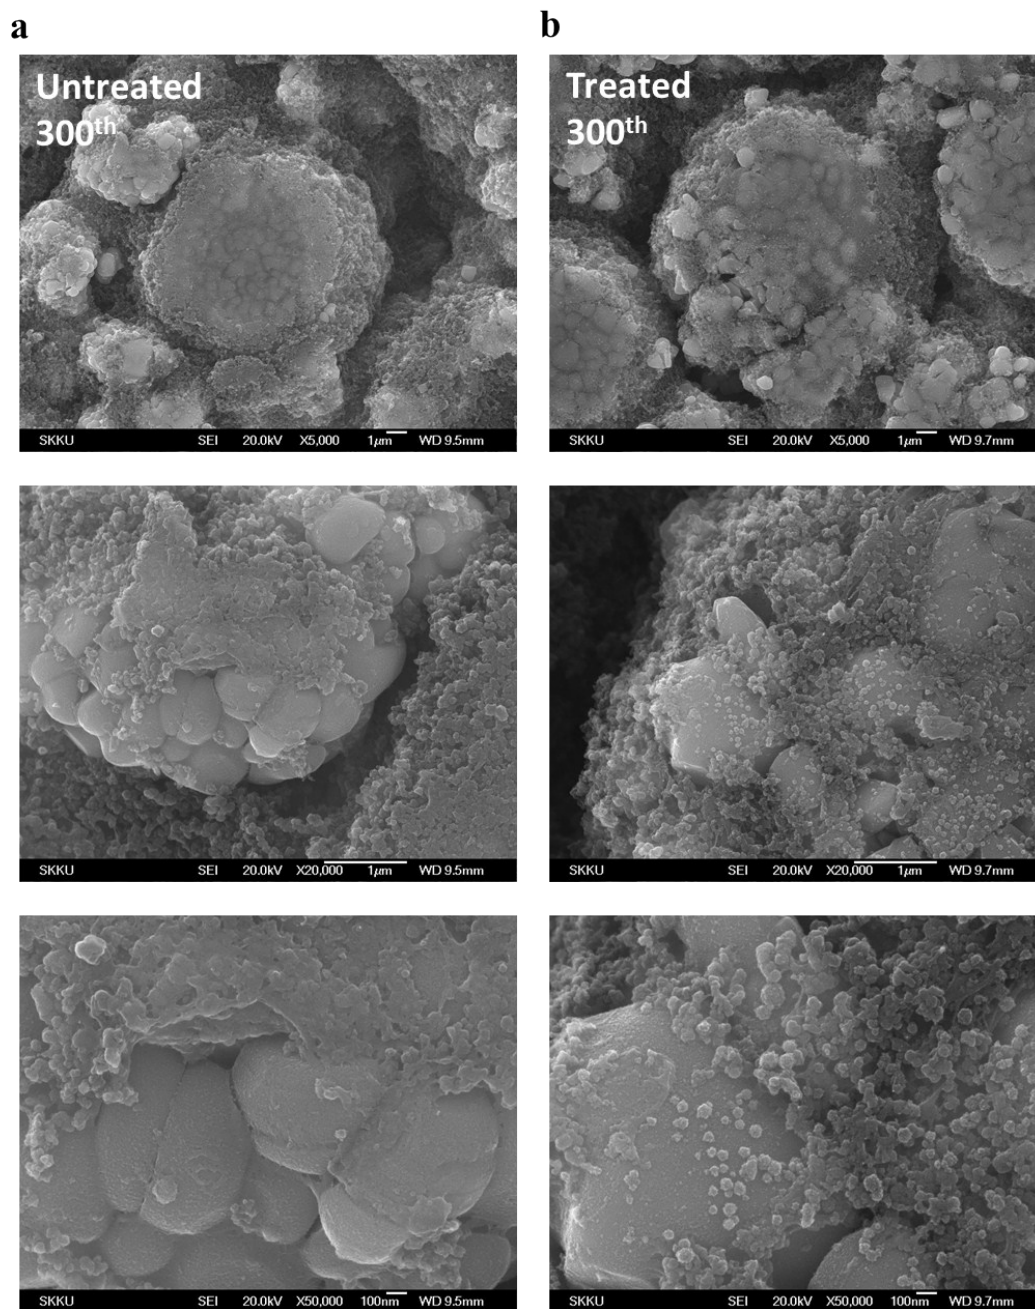

**Figure S7.** SEM images for (a) untreated and (b) treated sample at 300<sup>th</sup> cycle.

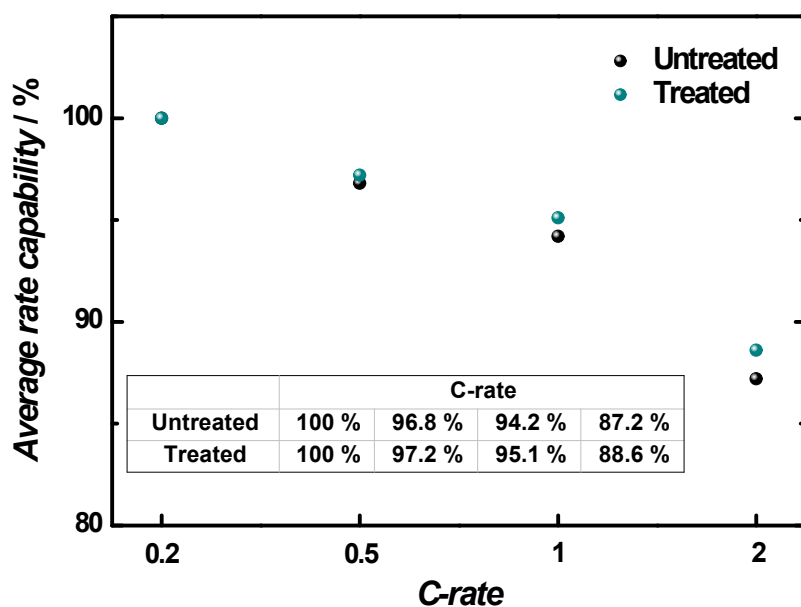

**Figure S8.** A comparison of the average rate capability between untreated and treated  $\text{Li}_{1-x}\text{Ni}_{0.88}\text{Co}_{0.11}\text{Al}_{0.01}\text{O}_2$  cathode materials

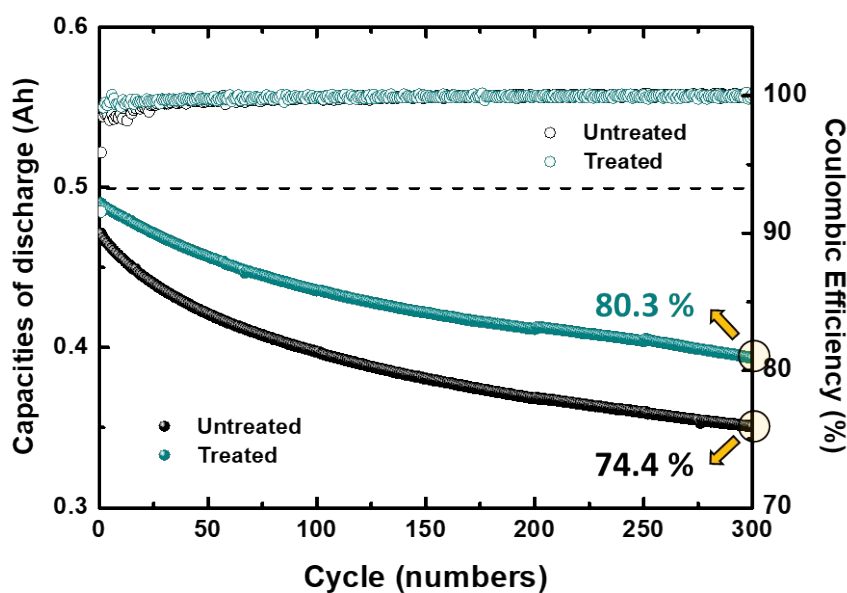

**Figure S9.** Cycling performance of untreated and treated  $\text{Li}_{1-x}\text{Ni}_{0.88}\text{Co}_{0.11}\text{Al}_{0.01}\text{O}_2$
